# Supplementary material for: Exploring Self-Management Barriers and Facilitators Experience by People with Chronic Musculoskeletal Pain - A Qualitative Study
Source: bioRxiv or medRxiv preprint supplement (doi:10.1101/2023.01.18.23284708), 2023-01-18
Supplement: Supplementary file [file media-1.pdf]

## Appendix 1 – Interview guide

| Research questions                                                                                                                                             | Interview questions                                                                                                                                                                                       | Prompting questions (Optional)                                                                                                                                                                                                                                                                                                                                                                                                                                             |
|----------------------------------------------------------------------------------------------------------------------------------------------------------------|-----------------------------------------------------------------------------------------------------------------------------------------------------------------------------------------------------------|----------------------------------------------------------------------------------------------------------------------------------------------------------------------------------------------------------------------------------------------------------------------------------------------------------------------------------------------------------------------------------------------------------------------------------------------------------------------------|
| <p><u>Theme 1: Course of illness</u></p> <p>1) How has the participant course of illness been from onset until today?<br/>(Timeline exercise)</p>              | <p>1) Could you describe your history from the onset of your pain until today?</p>                                                                                                                        | <ul style="list-style-type: none"> <li>• When did it start?</li> <li>• Has there been periods during your history where it have been difficult to self-manage?</li> <li>• Has there been periods during your history where it have been easier to self-manage?</li> <li>• On a scale from 0 to 10 – How difficult was it to self-manage in that situation/period?</li> <li>• On a scale from 0 to 10 – How easy was it to self-manage in that situation/period?</li> </ul> |
| <p><u>Theme 2: Barriers for self-management</u></p> <p>1) Which barriers does the participant experience, when trying to self-manage during everyday life?</p> | <p>1) Could you describe some of the situations/periods where it was difficult for you to self-manage your condition?</p> <p>2) What have you experienced as being the most difficult to self-manage?</p> | <ul style="list-style-type: none"> <li>• Can you elaborate?</li> <li>• How was that experience?</li> <li>• Why was it difficult?</li> <li>• What did it do to you?</li> <li>• Have you experienced other situations/periods where it was difficult to self-manage?</li> </ul>                                                                                                                                                                                              |

|                                                                                                                                                                        |                                                                                                                                                                                                                                                    |                                                                                                                                                                                                                                                                                                                |
|------------------------------------------------------------------------------------------------------------------------------------------------------------------------|----------------------------------------------------------------------------------------------------------------------------------------------------------------------------------------------------------------------------------------------------|----------------------------------------------------------------------------------------------------------------------------------------------------------------------------------------------------------------------------------------------------------------------------------------------------------------|
| <p><u>Theme 3: Facilitators for self-management</u></p> <p>1) Which facilitators does the participant experience, when trying to self-manage during everyday life?</p> | <p>1) What have helped you to self-manage the situations/periods, which were difficult for you to manage?</p> <p>2) What have you experienced as being the greatest help to manage difficult situations/periods during your course of illness?</p> | <ul style="list-style-type: none"> <li>• Can you elaborate?</li> <li>• How was that experience?</li> <li>• Why did it help you?</li> <li>• Have you experienced other situations/periods, where you perceived something to be helpful for your ability to self-manage difficult situations/periods?</li> </ul> |
| <p><u>Theme 4: Completion</u></p> <p>1) Does the participant experience other barriers or facilitators than those, we've currently addressed?</p>                      | <p>1) Is there any other situations or periods during your course of illness, which have made it either more difficult or easier for you to self-manage your conditions?</p>                                                                       | <ul style="list-style-type: none"> <li>• Can you elaborate?</li> <li>• What did you experience as being difficult?</li> <li>• Why was that difficult for you?</li> <li>• What did you experience as being helpful?</li> <li>• Why was that helpful for you?</li> </ul>                                         |

## Codes

Stranger in my own body  
 Not able to do what I'm used to (Physically)  
 Not able to do what I'm used to (Socially)  
 Against my identity  
 Loosing my autonomy  
 Difficulty finding acceptance  
 Not being able to fulfill my sociale role  
 Planning and prioritizing ressourcers are difficult  
 Planning and structure is necessary  
 Pacing is difficult  
 Lack of management strategies is difficult  
 Lack of knowledge is difficult  
 Uncertainty and a lack of understanding  
 Uncertainty about what the future brings  
 Worries and concerns about the future  
 Feeling like a burden  
 Negative thoughts and emotions is difficult  
 What might others be thinking about me  
 Fear of becoming/feeling worse again  
 Feeling like a burden to my colleagues  
 Sleep disturbances and insomnia  
 Lack of mental and physical energy  
 Lack of validation from healthcare professionals  
 Lack of understanding from family and friends  
 Lack of support from work and employers  
 Difficult to live with an invisible disease  
 Being on sick leave is difficult  
 Not receiving the necessary help is difficult

## Barriers

Biographical disruption

Uncertainty and psychological distress

Lack of social support

## Barriers and facilitators for Self-Management

## Facilitators

Acceptance and optimism

Pain-relieving strategies

Social support

## Codes

Acceptance is a major facilitator  
 Acceptance helps you explain CMP to others  
 A psychologist can help finding acceptance  
 Keeping a positive mindset  
 Succesful experiences facilitates hope  
 Pacing helps you manage your daily ressources  
 Ambivalence concerning the use of analgesics  
 Physical activity is pain-relieving  
 Injections are pain-relieving  
 Rehabilitation and surgery are pain-relieving  
 Analgesics are pain-relieving  
 Mindfulness are pain-relieving  
 Pain-relief facilitates hope and optimism  
 Having pain-relieving strategies are helpful  
 Exercise facilitates a feeling of empowerment  
 Exercise is pain-relieving  
 Being understood by my colleagues is helpful  
 Being understood by healthcare professionals  
 Being understood by my family and friends  
 Social support is a major facilitator  
 Social support with activities of daily living is helpful  
 Being together with others is helpful  
 Support from colleagues and employer is a help  
 Social support from healthcare professionals  
 Positive information from healthcare professionals  
 Recevling a diagnosis is reassuring  
 Feeling acknowledged and validated
